# Supplementary material for: METAMVGL: a multi-view graph-based metagenomic contig binning algorithm by integrating assembly and paired-end graphs
Source: PubMed Central journal article supplement (PMC8296540; doi:10.1186/s12859-021-04284-4), 2021-07-22
Supplement: 12859_2021_4284_MOESM3_ESM.pdf [file 12859_2021_4284_MOESM3_ESM.pdf]

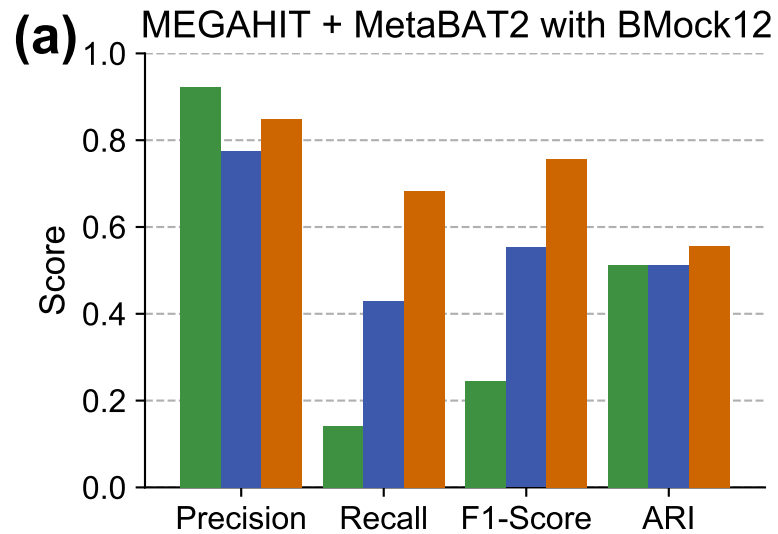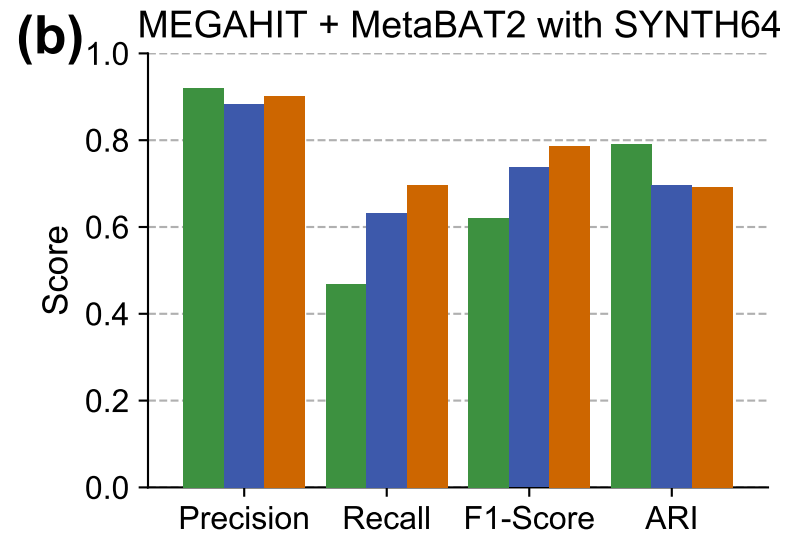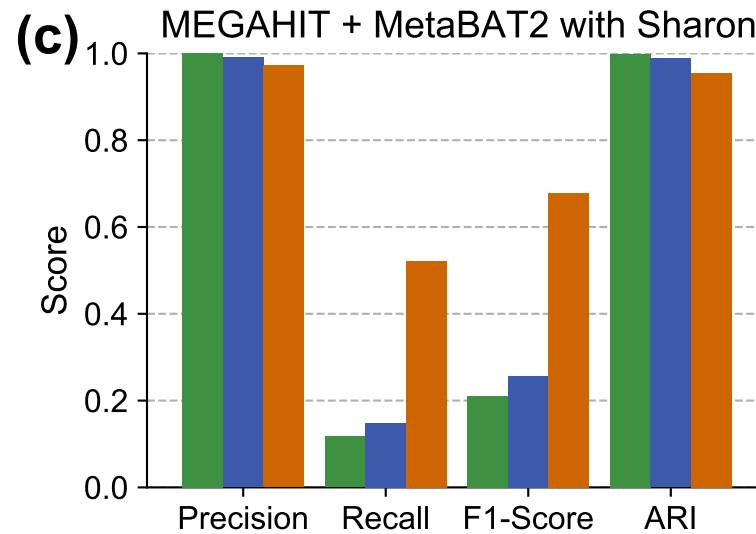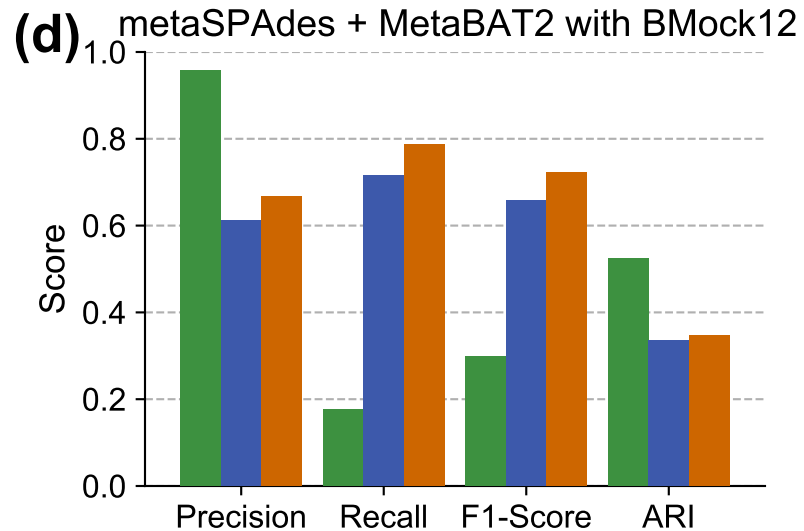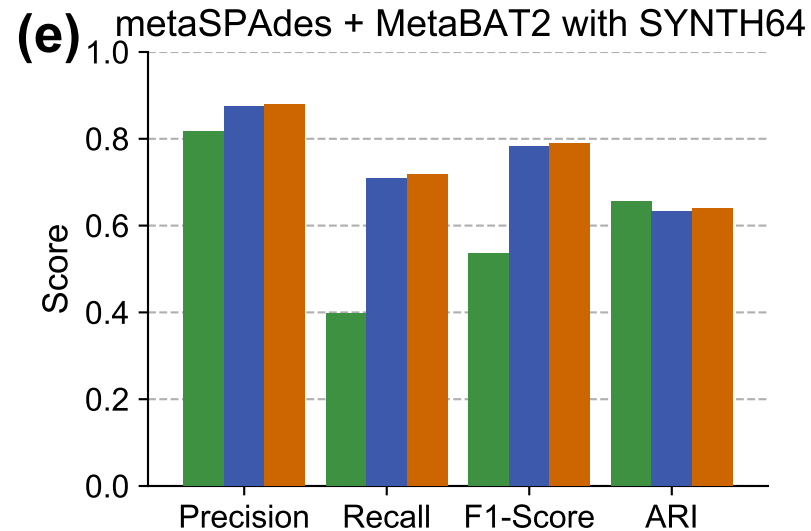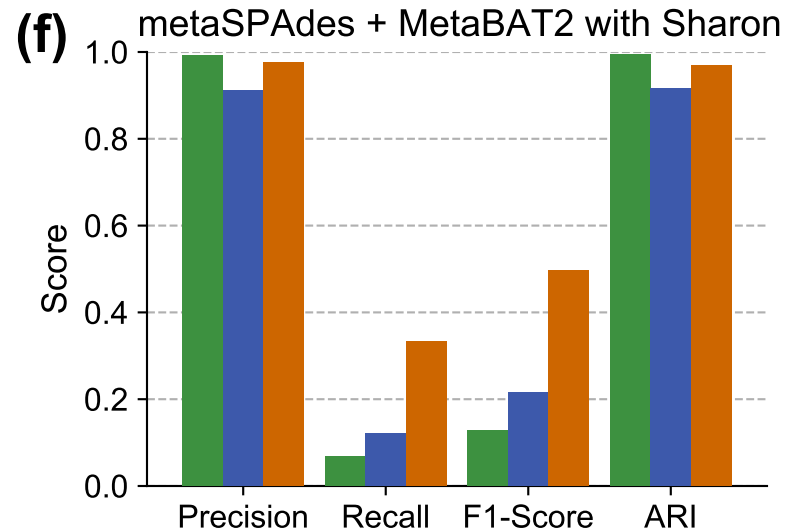

■ MetaBAT2   ■ GraphBin   ■ METAMVGL
