# Supplementary material for: METAMVGL: a multi-view graph-based metagenomic contig binning algorithm by integrating assembly and paired-end graphs
Source: PubMed Central journal article supplement (PMC8296540; doi:10.1186/s12859-021-04284-4), 2021-07-22
Supplement: 12859_2021_4284_MOESM5_ESM.pdf [file 12859_2021_4284_MOESM5_ESM.pdf]

**(a)** MEGAHIT + CONCOCT with BMock12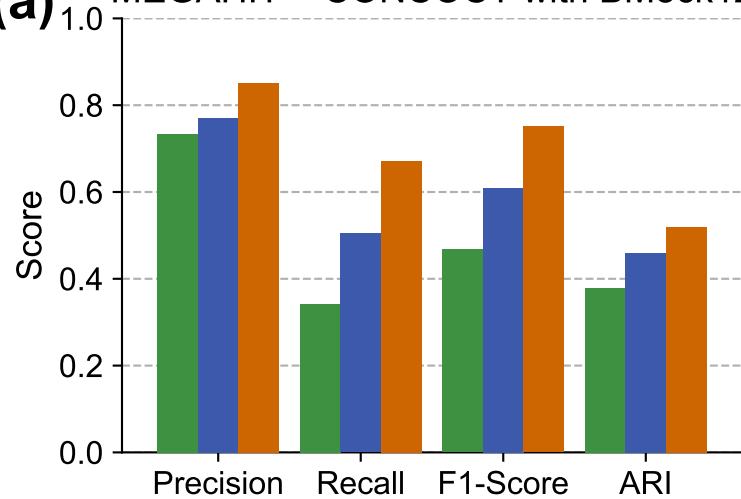**(b)** MEGAHIT + CONCOCT with SYNTH64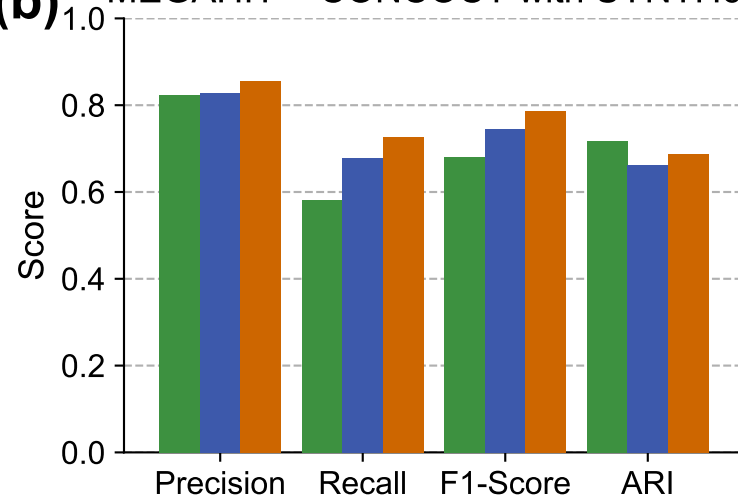**(c)** MEGAHIT + CONCOCT with Sharon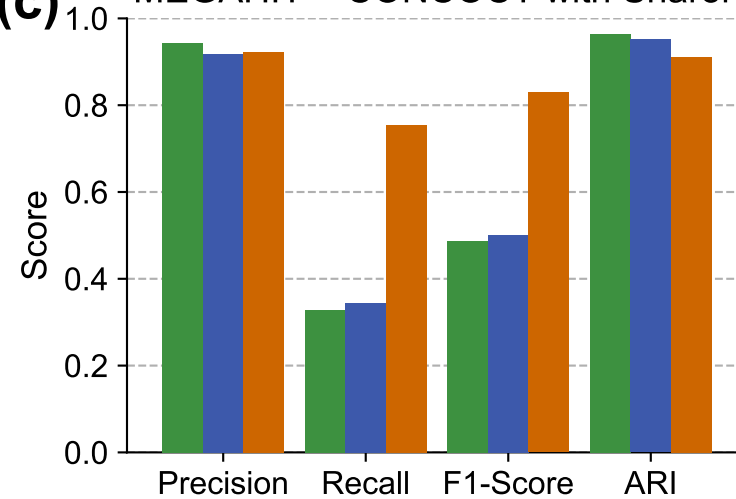**(d)** metaSPAdes + CONCOCT with BMock12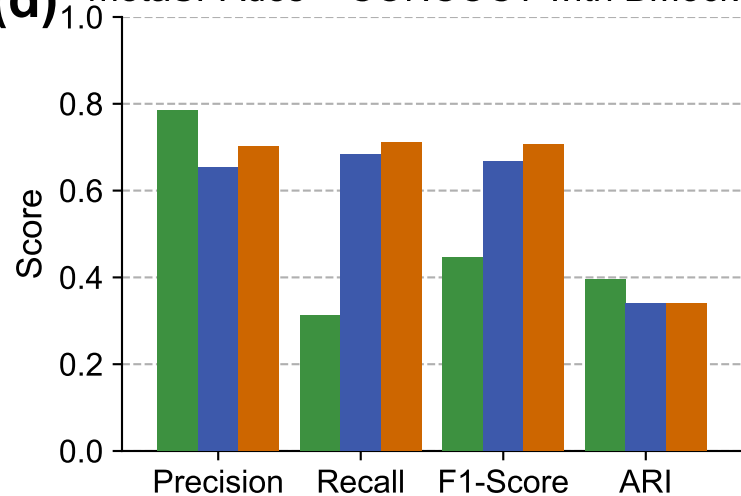**(e)** metaSPAdes + CONCOCT with SYNTH64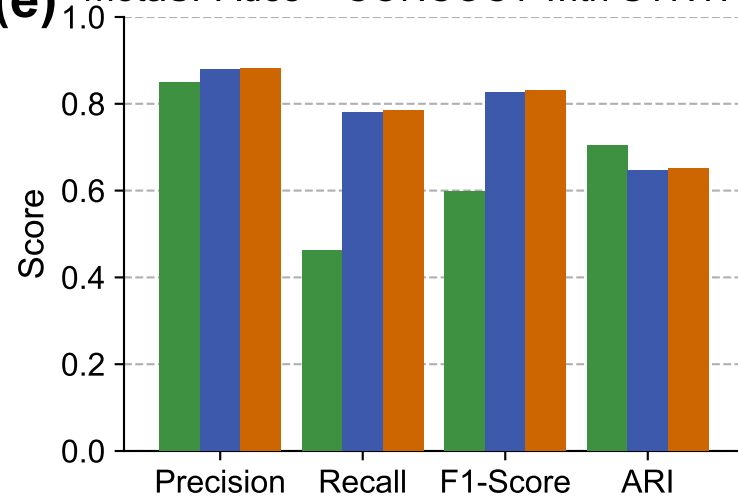**(f)** metaSPAdes + CONCOCT with Sharon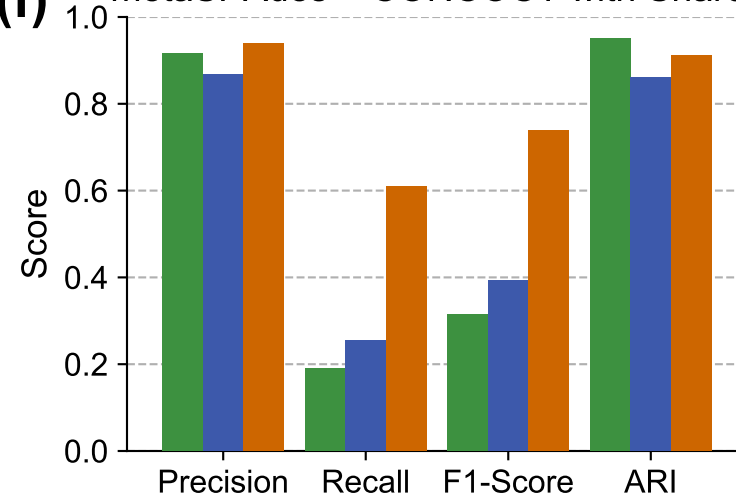

■ CONCOCT   
 ■ GraphBin   
 ■ METAMVGL
